# Supplementary material for: Evolution and Divergence of H3N8 Equine Influenza Viruses Circulating in the United Kingdom from 2013 to 2015
Source: MDPI journal article supplement (doi:10.3390/pathogens6010006), 2017-02-08
Supplement: s1 [file s1]

# Supplementary Materials: Evolution and Divergence of H3N8 Equine Influenza Viruses Circulating in the United Kingdom from 2013 to 2015

Adam Rash, Rachel Morton, Alana Woodward, Olivia Maes, John McCauley, Neil Bryant and Debra Elton

**Figure S1.** Amino acid alignment comparing amino acid numbers of equine influenza virus N8 neuraminidase against H5N1 neuraminidase from 2HTY pdb structure file.

|                       |                                                                                   |    |    |    |    |    |    |    |
|-----------------------|-----------------------------------------------------------------------------------|----|----|----|----|----|----|----|
| N1 numbering:         | 10                                                                                | 20 | 30 | 40 | 50 | 60 | 70 | 80 |
| N8 numbering:         | 8                                                                                 | 18 | 28 | 38 | 48 | 58 | 68 | 78 |
| N1 (H5N1: 2HTY)       | -----                                                                             |    |    |    |    |    |    |    |
| N8 (Equine: KF559336) | --MNPQKII TIGSASLGIL IINVLHVVS IIVTVLVN NNGLNCKGT IIREYNETVR VEKITQWHT SAIKYIERPP |    |    |    |    |    |    |    |

  

|                       |                                                                                          |     |     |     |     |     |     |     |
|-----------------------|------------------------------------------------------------------------------------------|-----|-----|-----|-----|-----|-----|-----|
| N1 numbering:         | 90                                                                                       | 100 | 110 | 120 | 130 | 140 | 150 | 160 |
| N8 numbering:         | 88                                                                                       | 98  | 108 | 118 | 128 | 138 | 148 | 158 |
| N1 (H5N1: 2HTY)       | --VKLAGNSS LCPINGWAVY SKDNSIRIGS KGDVVFVIREP FISCCHLECR TFFLTQGALL NDKHSNGTVK DRSPHRTLMS |     |     |     |     |     |     |     |
| N8 (Equine: KF559336) | NEYVMNTEP ..EAQ.F.PF ....G..... R.H..... .V...PS... .....S... .....Y.....                |     |     |     |     |     |     |     |

  

|                       |                                                                                         |     |     |     |     |     |     |     |
|-----------------------|-----------------------------------------------------------------------------------------|-----|-----|-----|-----|-----|-----|-----|
| N1 numbering:         | 169A                                                                                    | 179 | 189 | 199 | 209 | 219 | 229 | 239 |
| N8 numbering:         | 168                                                                                     | 178 | 188 | 198 | 208 | 218 | 228 | 238 |
| N1 (H5N1: 2HTY)       | CPVGEAPSPY NSRFESVAWS ASACHDGTSW LTIGISGPDN GAVAVLKYNG IITDTIKSWR NNILRTQESE CACVNGSCPT |     |     |     |     |     |     |     |
| N8 (Equine: KF559336) | VKI.QS.NV. QA..... .T.....KK. M...VT.... Q.I..VN.G. VPV.I.N..A GD.....S .T.IK.N.YW      |     |     |     |     |     |     |     |

  

|                       |                                                                                         |     |     |     |     |     |     |     |
|-----------------------|-----------------------------------------------------------------------------------------|-----|-----|-----|-----|-----|-----|-----|
| N1 numbering:         | 249                                                                                     | 259 | 269 | 279 | 289 | 299 | 310 | 320 |
| N8 numbering:         | 248                                                                                     | 258 | 268 | 278 | 288 | 298 | 308 | 318 |
| N1 (H5N1: 2HTY)       | VMTDGPSNGQ ASYKIFKMEK GKVVKSVELD APNYHYECS CYPNAGEITC VCRDNWHGSN RPWVSFNQNL EYQIGYICSG  |     |     |     |     |     |     |     |
| N8 (Equine: KF559336) | .....A.R. .K.R....AKD .R.IGQTDIS FNGG.I.... ....E.KVE. I.....T.T. ..ILVISSD. S.TV..L.A. |     |     |     |     |     |     |     |

  

|                       |                                                                                         |     |     |     |     |     |     |     |
|-----------------------|-----------------------------------------------------------------------------------------|-----|-----|-----|-----|-----|-----|-----|
| N1 numbering:         | 330                                                                                     | 341 | 351 | 361 | 371 | 381 | 391 | 402 |
| N8 numbering:         | 328                                                                                     | 338 | 348 | 358 | 368 | 378 | 388 | 398 |
| N1 (H5N1: 2HTY)       | VFGDNPRPND G--TGSCGPV SSNGAYGVKG FSPKYGNVW IGRTKSTNSR SGFEMIWDPN GWTETDSSFS VKQDIVAITD  |     |     |     |     |     |     |     |
| N8 (Equine: KF559336) | IPT.T..GE. SQF....TSP LG.KG..... .G.RQ.TD.. A...I.RT.. ....I.KIR. ...QNSKDQI RR.V.IDDPN |     |     |     |     |     |     |     |

  

|                       |                                                                                 |     |     |     |     |     |     |
|-----------------------|---------------------------------------------------------------------------------|-----|-----|-----|-----|-----|-----|
| N1 numbering:         | 412                                                                             | 418 | 428 | 439 | 449 | 459 | 469 |
| N8 numbering:         | 408                                                                             | 418 | 428 | 438 | 448 | 458 | 468 |
| N1 (H5N1: 2HTY)       | WSGYSGSFVQ HPELTGLDCI RPCFWVELIR GRPKESTIWT SGSSISFCGV NSDTVGWSWP DGAELPFTID K- |     |     |     |     |     |     |
| N8 (Equine: KF559336) | .....TL PI...KKG.L V.....M... .K.E.T.... .S...VM... DHKIAS...H ...I...D... .M   |     |     |     |     |     |     |

■ - N1 structure file (2HTY) has no 301

■ - N1 structure file (2HTY) has no 334

■ - N1 structure file (2HTY) has no 337 or 338

■ - N1 structure file (2HTY) has no 393

■ - N1 structure file (2HTY) has 412, 412A, 412B, 412C and 412D

■ - N1 structure file (2HTY) has no 434

**Table S1.** Genetic similarity between the 144- and 179-groups and the recommended FC2 vaccine strain.

|      |           | <b>Vaccine</b> | <b>144-Group</b> |
|------|-----------|----------------|------------------|
| HA   | Vaccine   | -              | 98.4%            |
| (nt) | 179-group | 98.5%          | 97.9%            |
| HA   | Vaccine   | -              | 98.2%            |
| (aa) | 179-group | 98.1%          | 97.7%            |
| NA   | Vaccine   | -              | 98.2%            |
| (nt) | 179-group | 98.3%          | 96.9%            |
| NA   | Vaccine   | -              | 98.0%            |
| (aa) | 179-group | 98.7%          | 97.2%            |

Percentage similarity shown. HA = haemagglutinin, NA = neuraminidase, nt = nucleotide, aa = amino acid. Recommended vaccine strain is A/eq/Richmond/1/07. A/eq/Northamptonshire/4/15 used as the most recent isolate of the 144-group, A/eq/Ayrshire/1/13 used as the most recent isolate of the 179-group.
